# Supplementary material for: PSAT1 enhances the efficacy of the prognosis estimation nomogram model in stage-based clear cell renal cell carcinoma
Source: Springer Nature journal article supplement (doi:10.1186/s12885-024-12183-z), 2024-04-13
Supplement: MOESM1 [file 26976156]

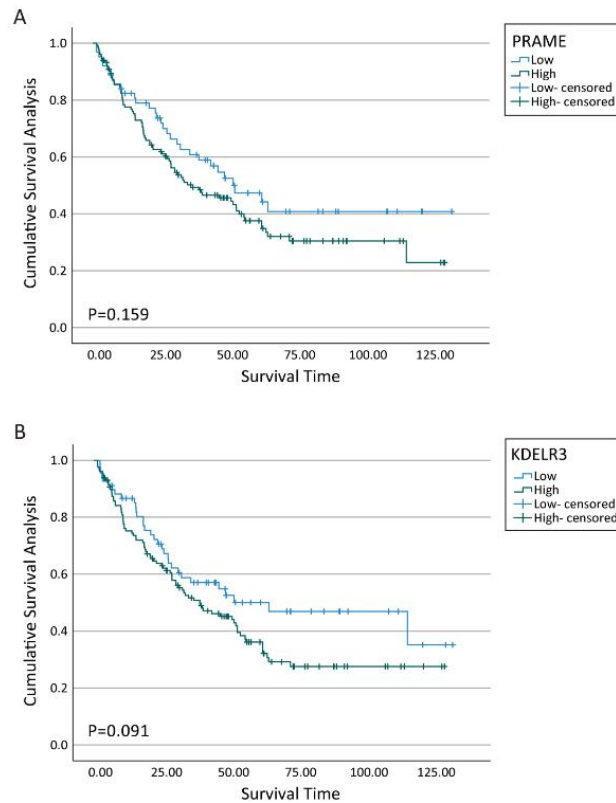

Supplement Figure 1

**Supplementary Figure 1. Kaplan-Meier plots for KIRC patients.**

(A) PRAME expression level about late-stage patients for overall survival. (B) KDELR3 expression level about late-stage patients for overall survival. The mortality rates of the different expression level showed a downward trend, which decreased rapidly at the beginning and then leveled off. The blue curve represents the high-expression, green curve represents the low-expression. Follow-up time for horizontal axis and vertical axis for survival rate. Survival curves were obtained by linking the corresponding survival rates at each time point.  $p < 0.05$  was considered statistically significant.
