# Supplementary material for: PSAT1 enhances the efficacy of the prognosis estimation nomogram model in stage-based clear cell renal cell carcinoma
Source: Springer Nature journal article supplement (doi:10.1186/s12885-024-12183-z), 2024-04-13
Supplement: MOESM2 [file 26976156]

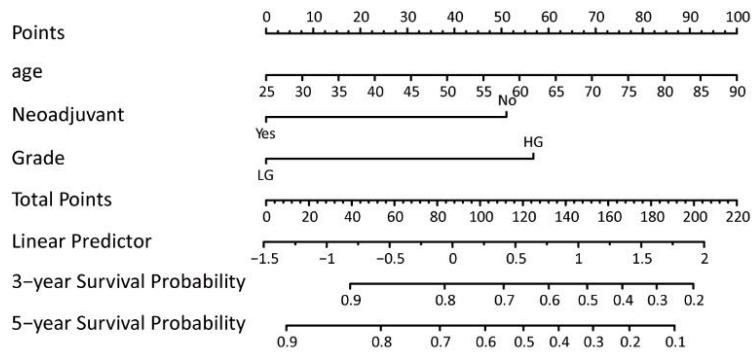

Supplement Figure 2

**Supplementary Figure 2. Single clinical variables-based nomogram for predicting 3-year and 5-year overall survival.** The risk factors were represented by points on the axis, with each factor corresponding to a line drawn upward. The total points located on the axis indicated the probability of 3-year and 5-year overall survival, represented by a line drawn downward to the survival axis.
