# Supplementary material for: PSAT1 enhances the efficacy of the prognosis estimation nomogram model in stage-based clear cell renal cell carcinoma
Source: Springer Nature journal article supplement (doi:10.1186/s12885-024-12183-z), 2024-04-13
Supplement: MOESM3 [file 26976156]

Uncropped scans of the Western blots shown in the indicated figures

Fig. 6b

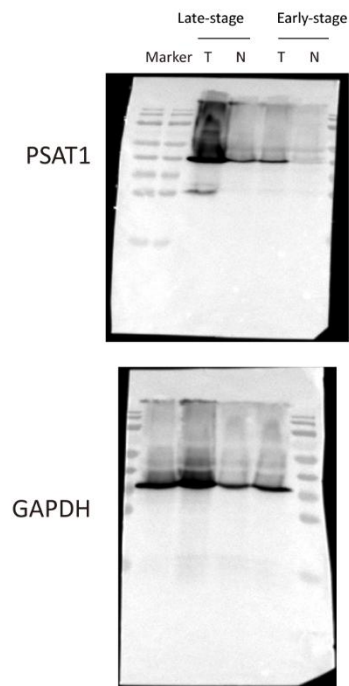

Supplement Figure 3

**Supplementary Figure 3. Uncropped scans of the WB shown in the indicated figures.**
